# Supplementary material
Source: Springer Nature journal article supplement (https://www.springermedizin.de/resource/supplementary/12885_2013_3931_MOESM5_ESM.pdf/9464770)

**A**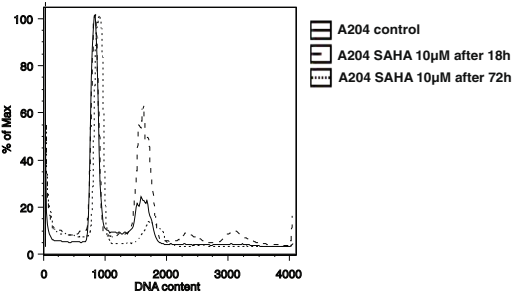**B**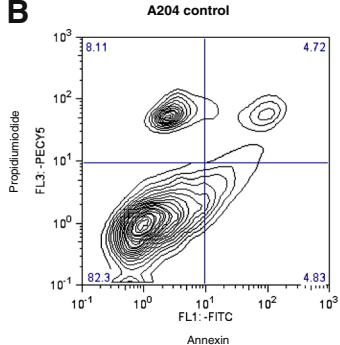**A204 SAHA 10 µM 72 h**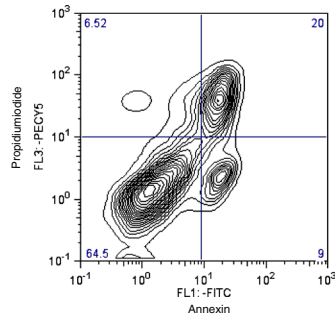**C**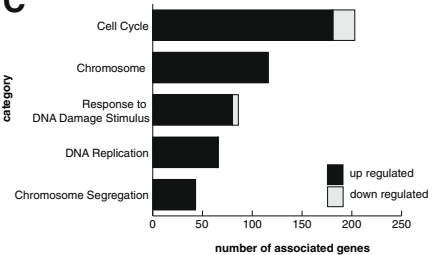

Supplement: MOESM5 [file 9464770]
